# Supplementary material for: Exploring the possible relationship between ambient heat and sudden infant death with data from Vienna, Austria
Source: PubMed Central journal article supplement (PMC5587259; doi:10.1371/journal.pone.0184312), 2017-09-06

Additional sensitivity analyses for the PLOS ONE article  
 “Exploring the possible relationship between ambient heat and  
 sudden infant death with data from Vienna, Austria”  
 by Thomas Waldhoer and Harald Heinzl, 2017

**Scenario 1 (corresponds to Figure 1 of the PLOS ONE article):** Association between maximum outdoor temperature and SIDS cases with mention of autopsy, Vienna, April–October 1984–2014. Maximum temperature was flexibly modelled with natural cubic splines with knots placed at the 10th, 50th, and 90th percentiles. For the day before and the day of the SIDS event, odds ratios (solid blue line) and 95% CI’s (transparent blue area) are shown for all ages (0-364 days) and two postneonatal periods. All odds ratios are relative to the reference temperature of 20°C, and are adjusted for mean relative humidity. The odds ratios are presented both on the original and the logarithmic scale.

P-Value for spline-modelled effect of maximum temperature:

|                           | # of SIDS cases | Previous day | Same day |
|---------------------------|-----------------|--------------|----------|
| all ages (0-364 days)     | 187             | 0.56         | 0.67     |
| 1-2 months (28-89 days)   | 74              | 0.52         | 0.40     |
| 3-11 months (90-364 days) | 96              | 0.61         | 0.42     |

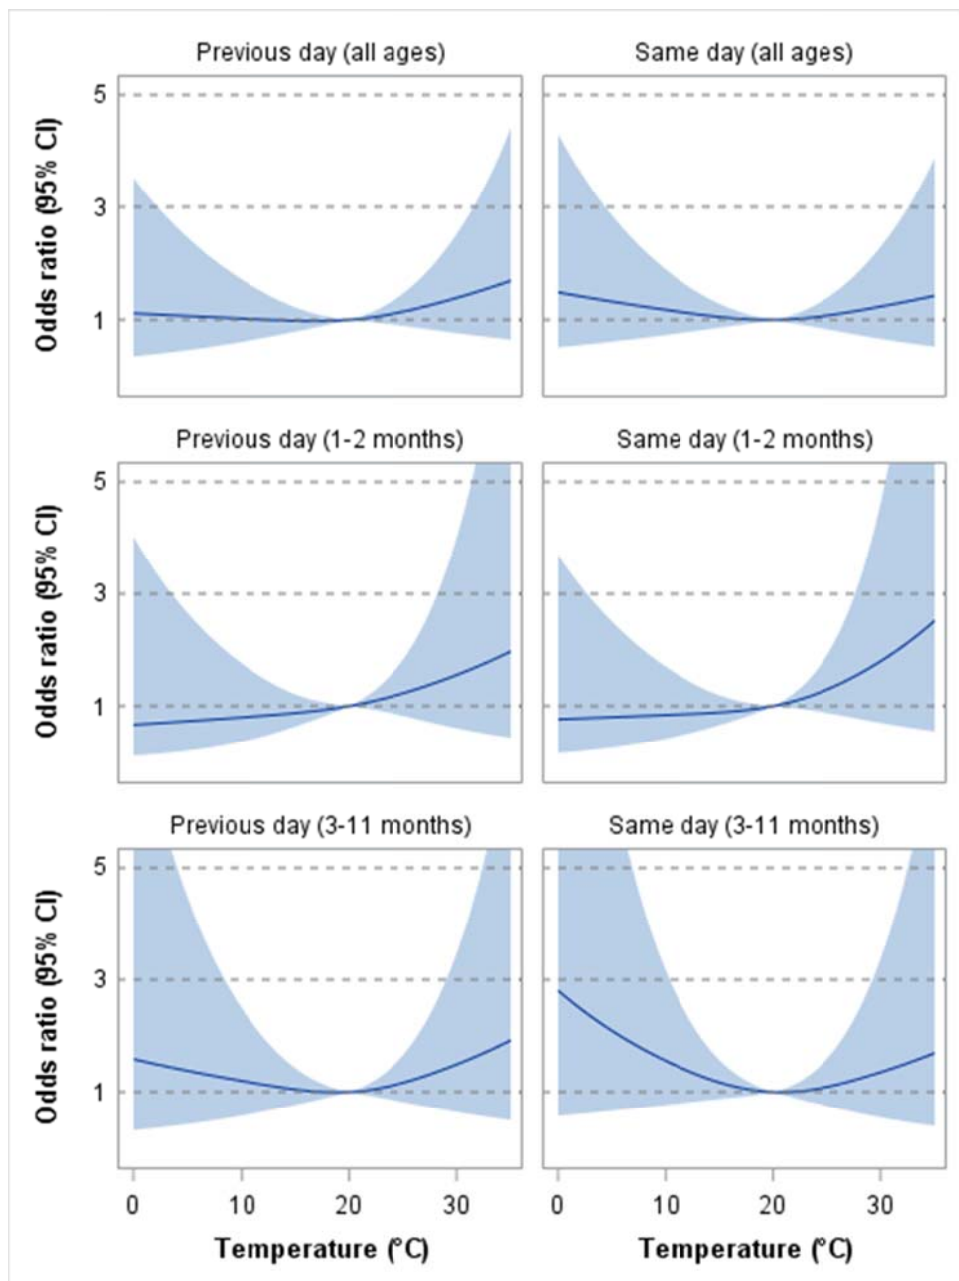

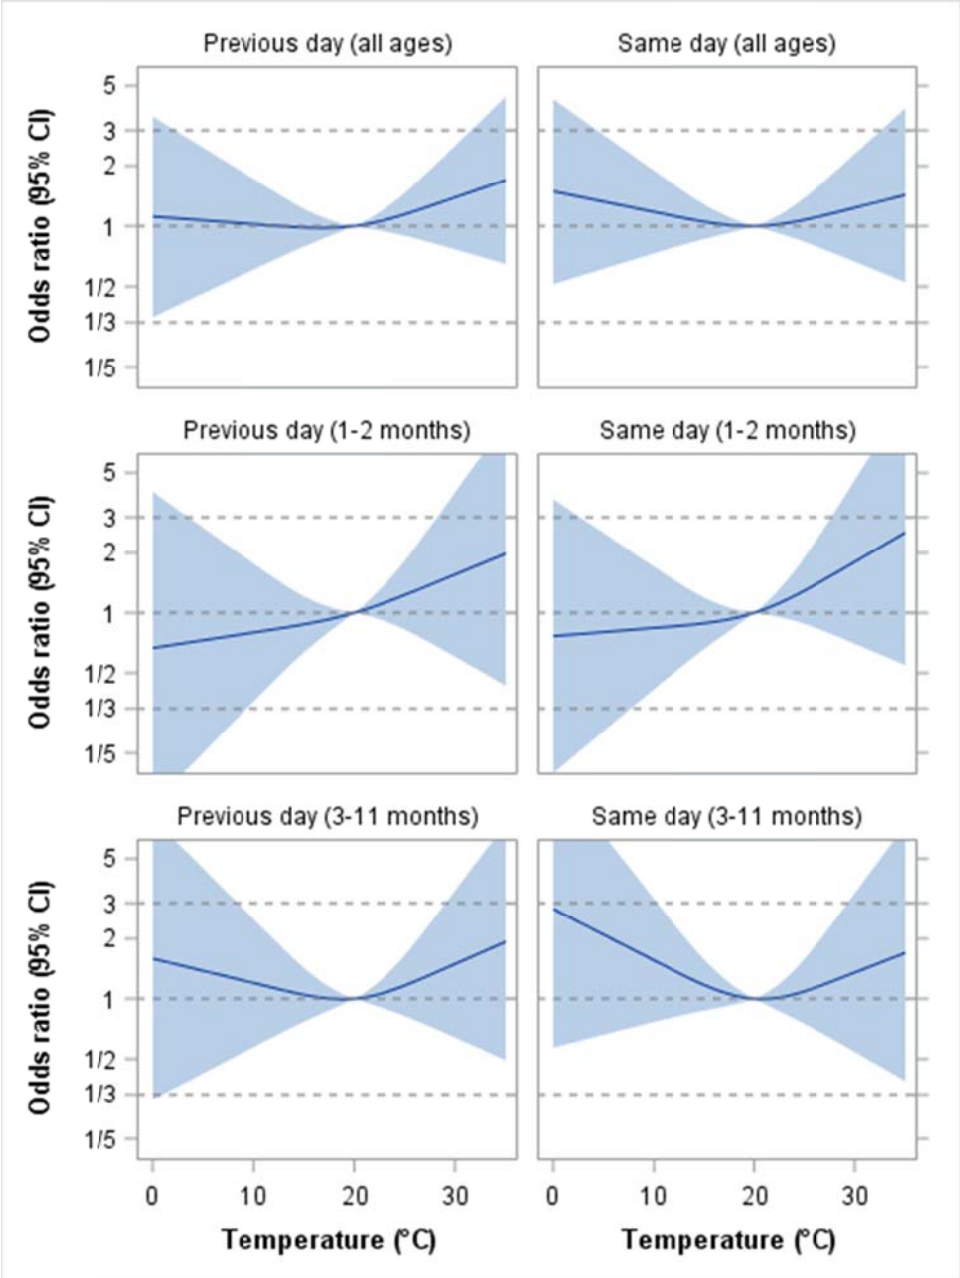

**Scenario 2:** Association between maximum outdoor temperature and SIDS cases with mention of autopsy, Vienna, April–October 1984–2014. Maximum temperature was flexibly modelled with natural cubic splines with knots placed at the **5th, 50th, and 95th percentiles**. For the day before and the day of the SIDS event, odds ratios (solid blue line) and 95% CI's (transparent blue area) are shown for all ages (0-364 days) and two postneonatal periods. All odds ratios are relative to the reference temperature of 20°C, and are adjusted for mean relative humidity. The odds ratios are presented both on the original and the logarithmic scale.

P-Value for spline-modelled effect of maximum temperature:

|                           | # of SIDS cases | Previous day | Same day |
|---------------------------|-----------------|--------------|----------|
| all ages (0-364 days)     | 187             | 0.59         | 0.73     |
| 1-2 months (28-89 days)   | 74              | 0.53         | 0.42     |
| 3-11 months (90-364 days) | 96              | 0.63         | 0.46     |

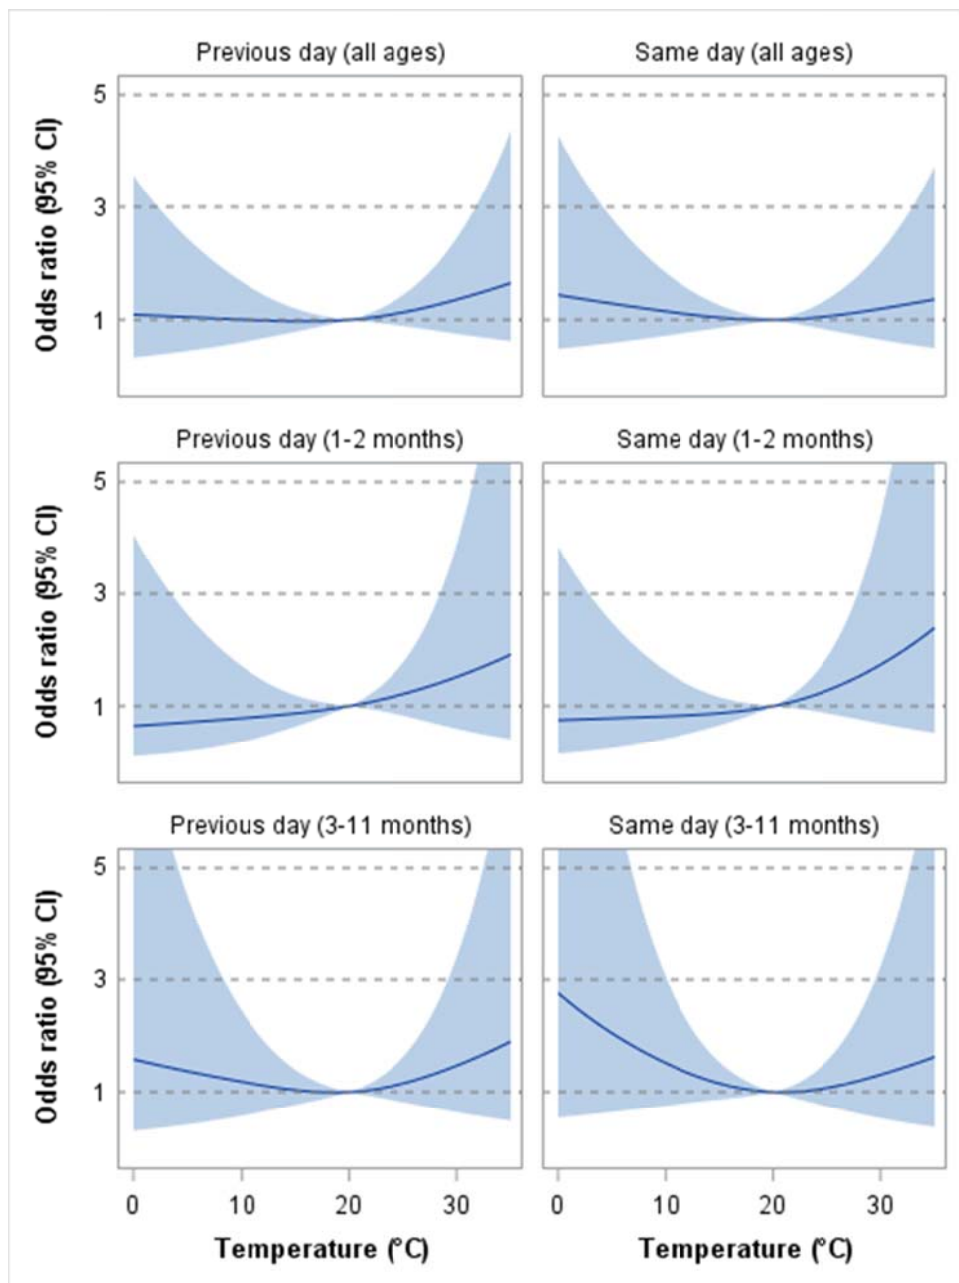

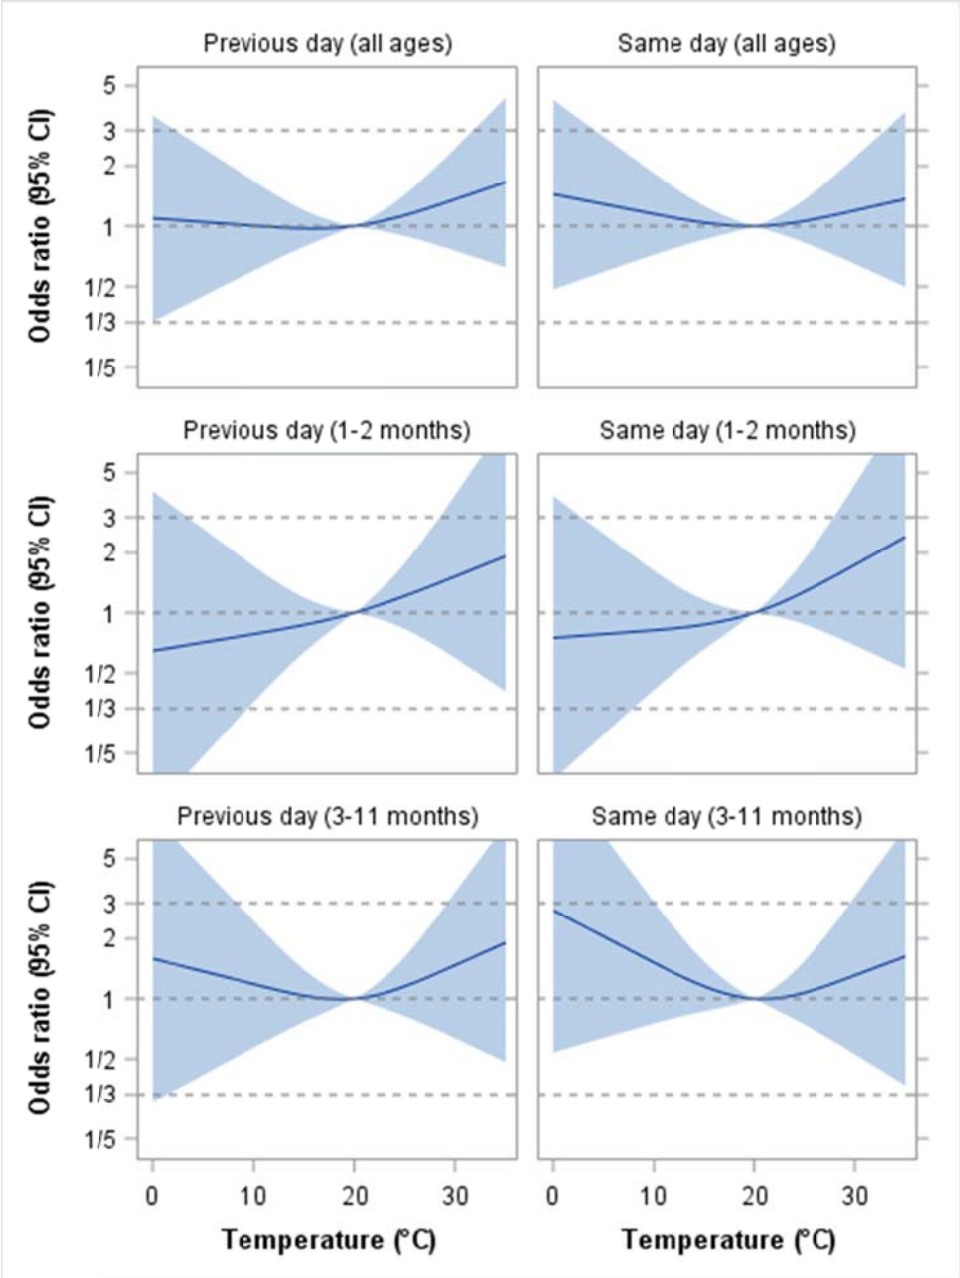

**Scenario 3:** Association between maximum outdoor temperature and SIDS cases with mention of autopsy, Vienna, April–October 1984–2014. Maximum temperature was flexibly modelled with natural cubic splines with knots placed at the **5th, 35th, 65th, and 95th percentiles**. For the day before and the day of the SIDS event, odds ratios (solid blue line) and 95% CI's (transparent blue area) are shown for all ages (0-364 days) and two postneonatal periods. All odds ratios are relative to the reference temperature of 20°C, and are adjusted for mean relative humidity. The odds ratios are presented both on the original and the logarithmic scale.

P-Value for spline-modelled effect of maximum temperature:

|                           | # of SIDS cases | Previous day | Same day |
|---------------------------|-----------------|--------------|----------|
| all ages (0-364 days)     | 187             | 0.97         | 0.74     |
| 1-2 months (28-89 days)   | 74              | 0.60         | 0.82     |
| 3-11 months (90-364 days) | 96              | 0.67         | 0.17     |

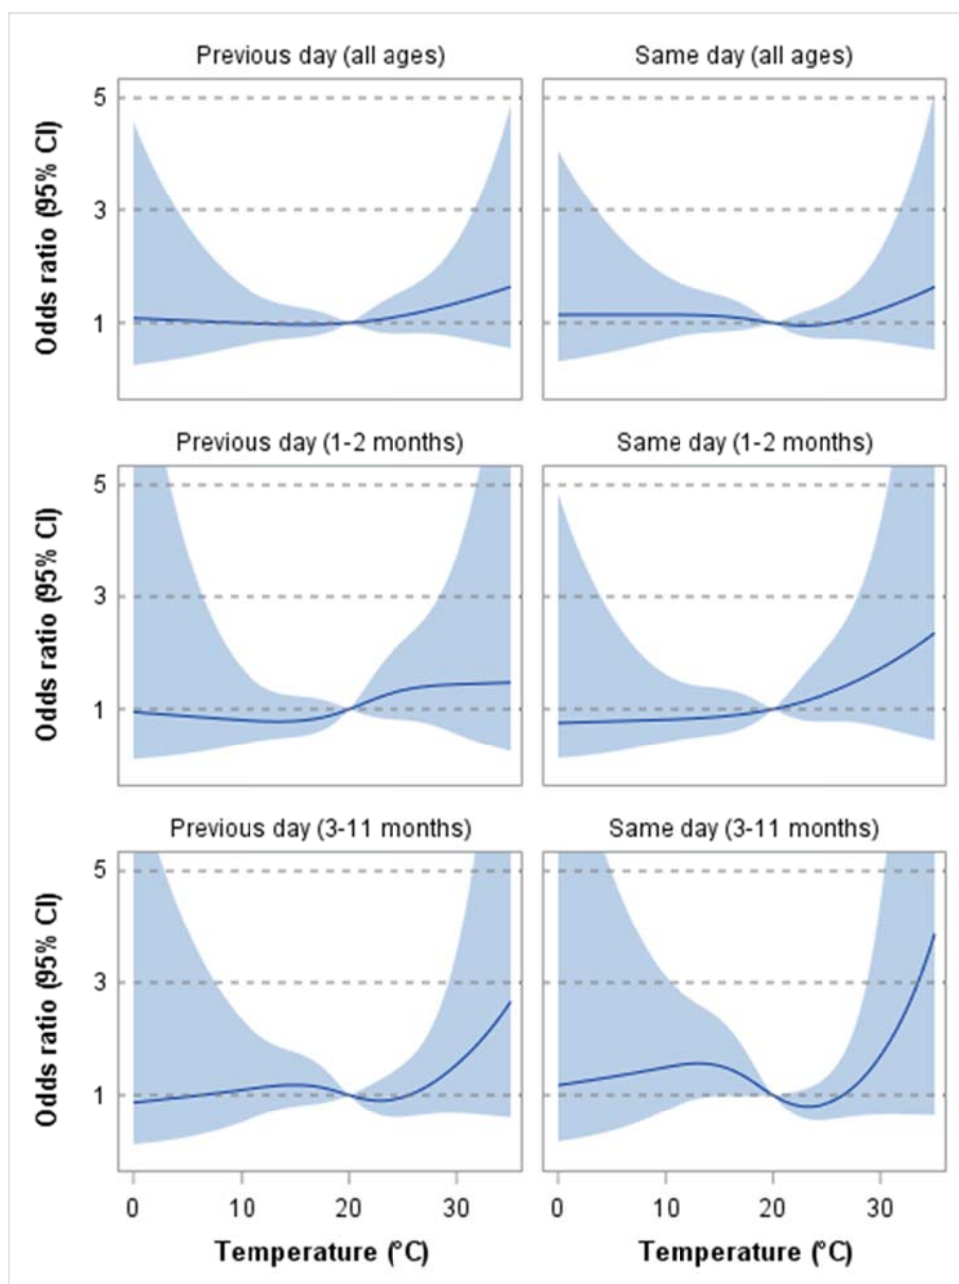



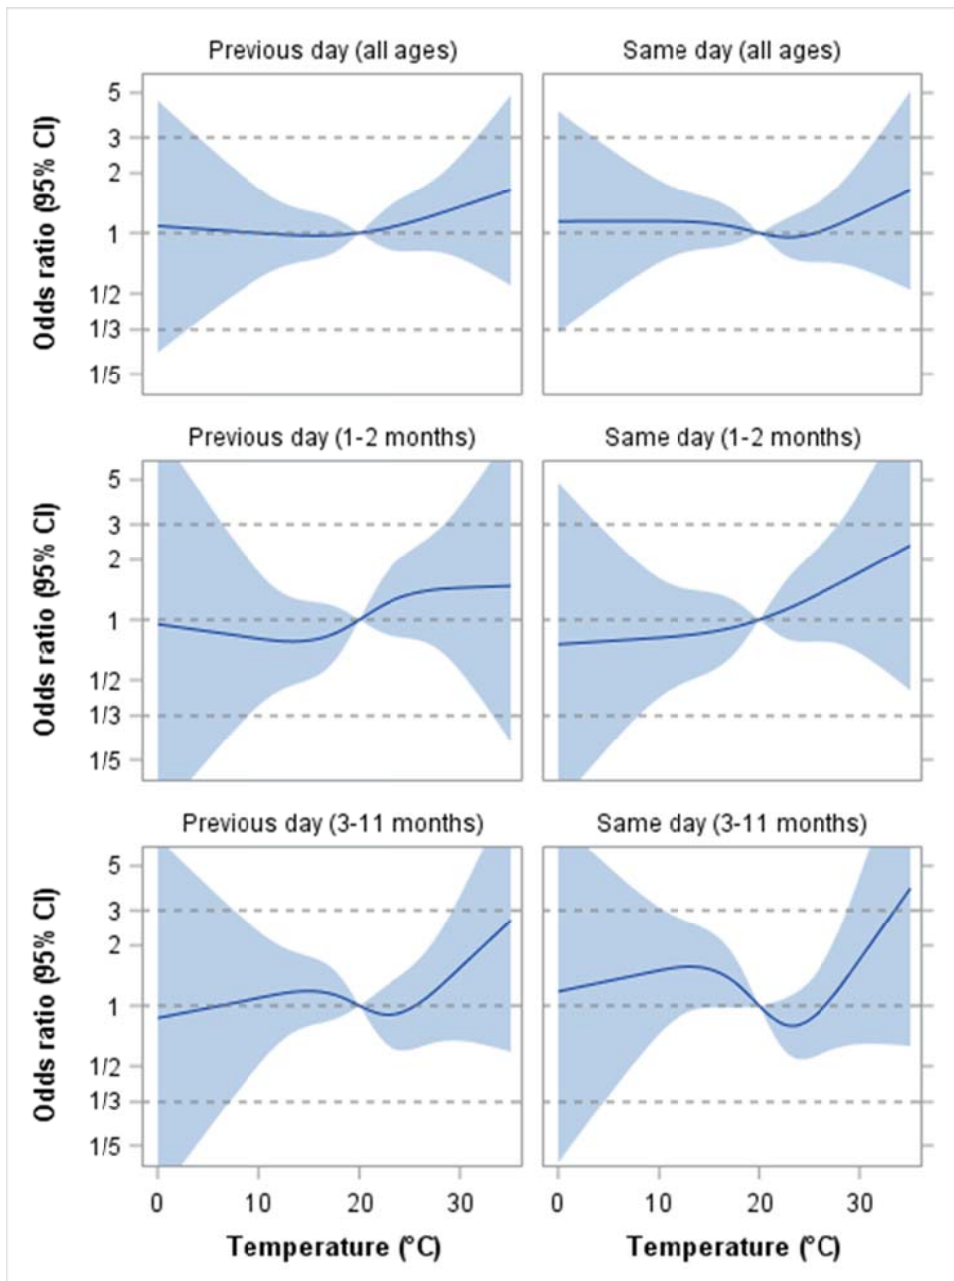

**Scenario 4:** Association between maximum outdoor temperature and SIDS cases with mention of autopsy, Vienna, April–October 1984–2014. Maximum temperature was flexibly modelled with natural cubic splines with knots placed at the **5th, 27.5th, 50th, 72.5th and 95th percentiles**. For the day before and the day of the SIDS event, odds ratios (solid blue line) and 95% CI's (transparent blue area) are shown for all ages (0-364 days) and two postneonatal periods. All odds ratios are relative to the reference temperature of 20°C, and are adjusted for mean relative humidity. The odds ratios are presented both on the original and the logarithmic scale.

P-Value for spline-modelled effect of maximum temperature:

|                           | # of SIDS cases | Previous day | Same day |
|---------------------------|-----------------|--------------|----------|
| all ages (0-364 days)     | 187             | 0.27         | 0.027*   |
| 1-2 months (28-89 days)   | 74              | 0.71         | 0.69     |
| 3-11 months (90-364 days) | 96              | 0.48         | 0.056    |

\*The overall model (which also includes mean relative humidity as covariate) was not statistically significant ( $p=0.17$ ) when applying the two-sided significance level  $\alpha = 0.05$ .

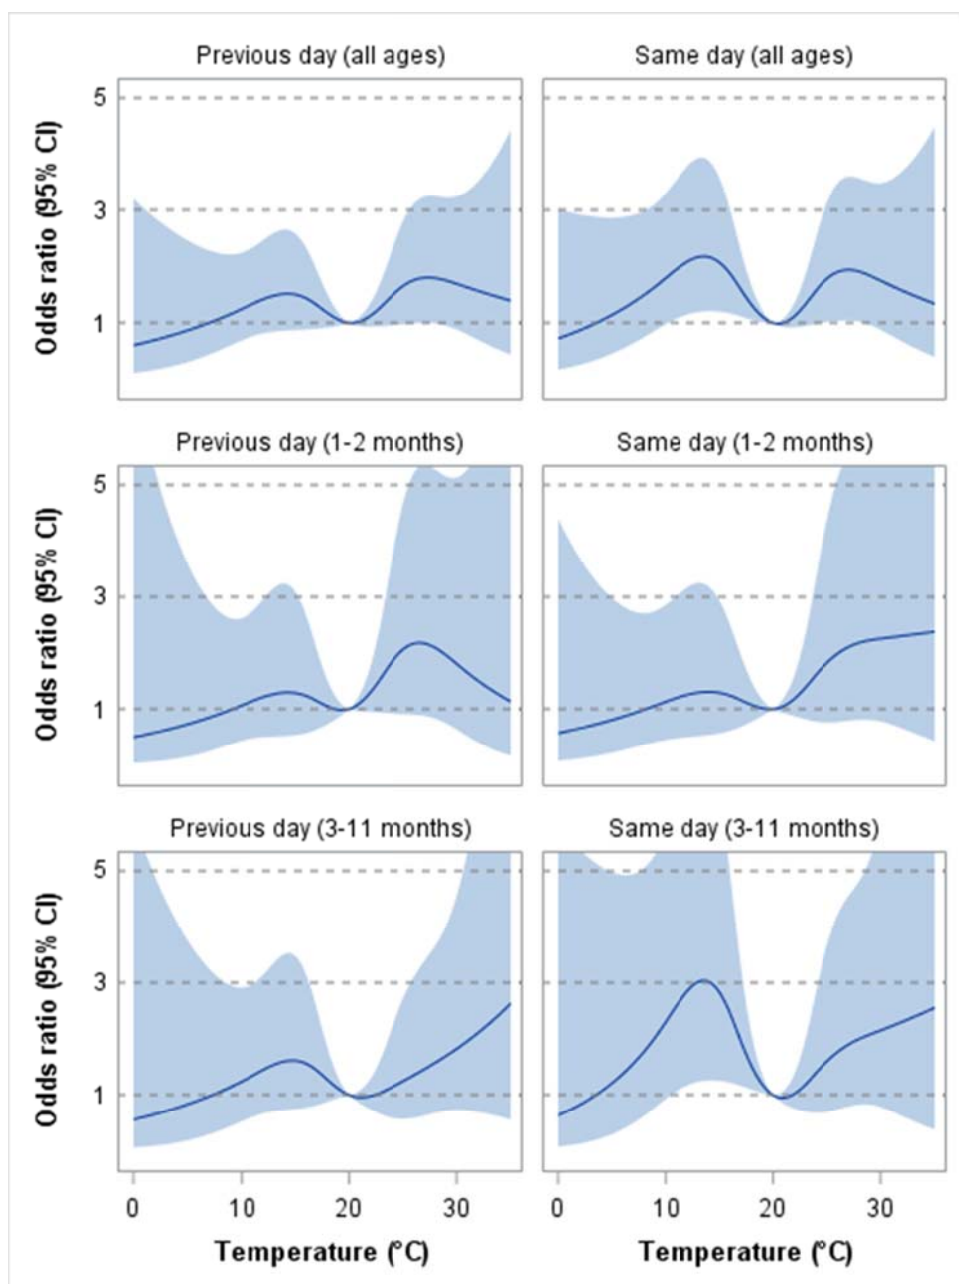

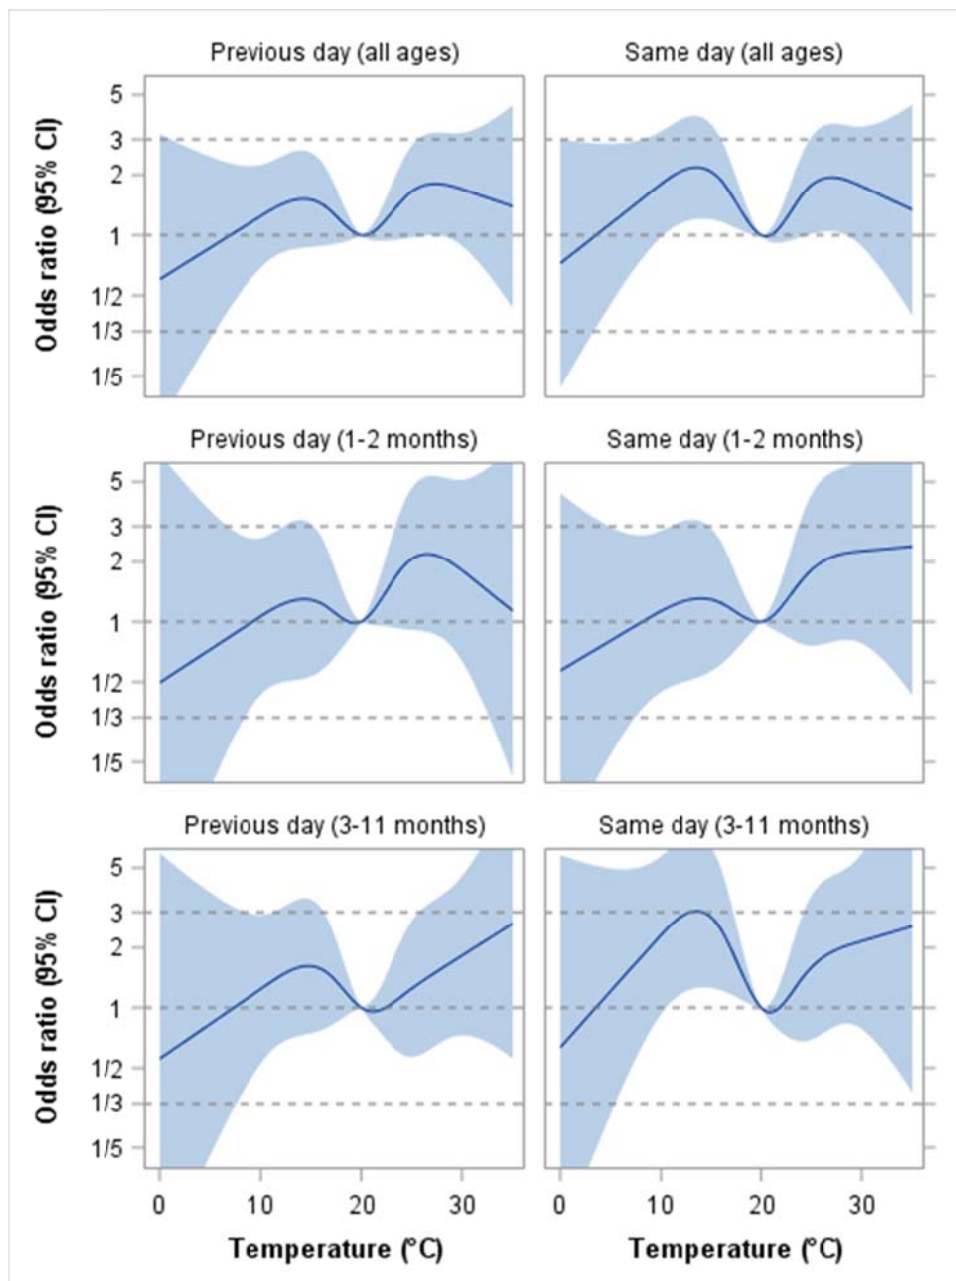

**Scenario 5:** Association between maximum outdoor temperature and SIDS cases with mention of autopsy, Vienna, April–October 1984–2014. Maximum temperature was flexibly modelled with natural cubic splines with knots placed at the 10th, 50th, and 90th percentiles. For the day before and the day of the SIDS event, odds ratios (solid blue line) and 95% CI's (transparent blue area) are shown for all ages (0-364 days) and two postneonatal periods. All odds ratios are relative to the reference temperature of 20°C, **and are not adjusted for mean relative humidity**. The odds ratios are presented both on the original and the logarithmic scale.

P-Value for spline-modelled effect of maximum temperature:

|                           | # of SIDS cases | Previous day | Same day |
|---------------------------|-----------------|--------------|----------|
| all ages (0-364 days)     | 187             | 0.55         | 0.67     |
| 1-2 months (28-89 days)   | 74              | 0.60         | 0.50     |
| 3-11 months (90-364 days) | 96              | 0.53         | 0.51     |

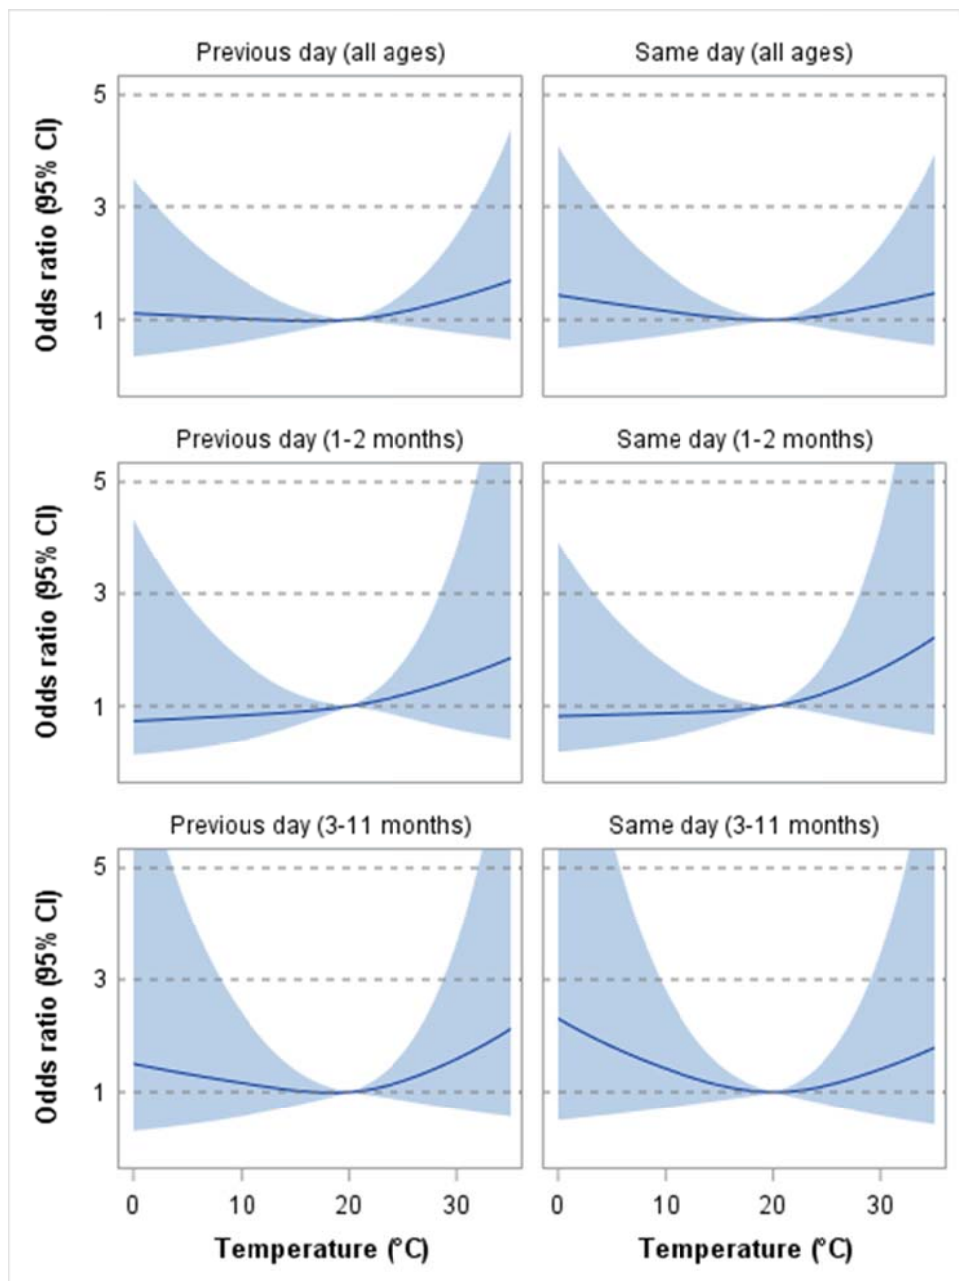

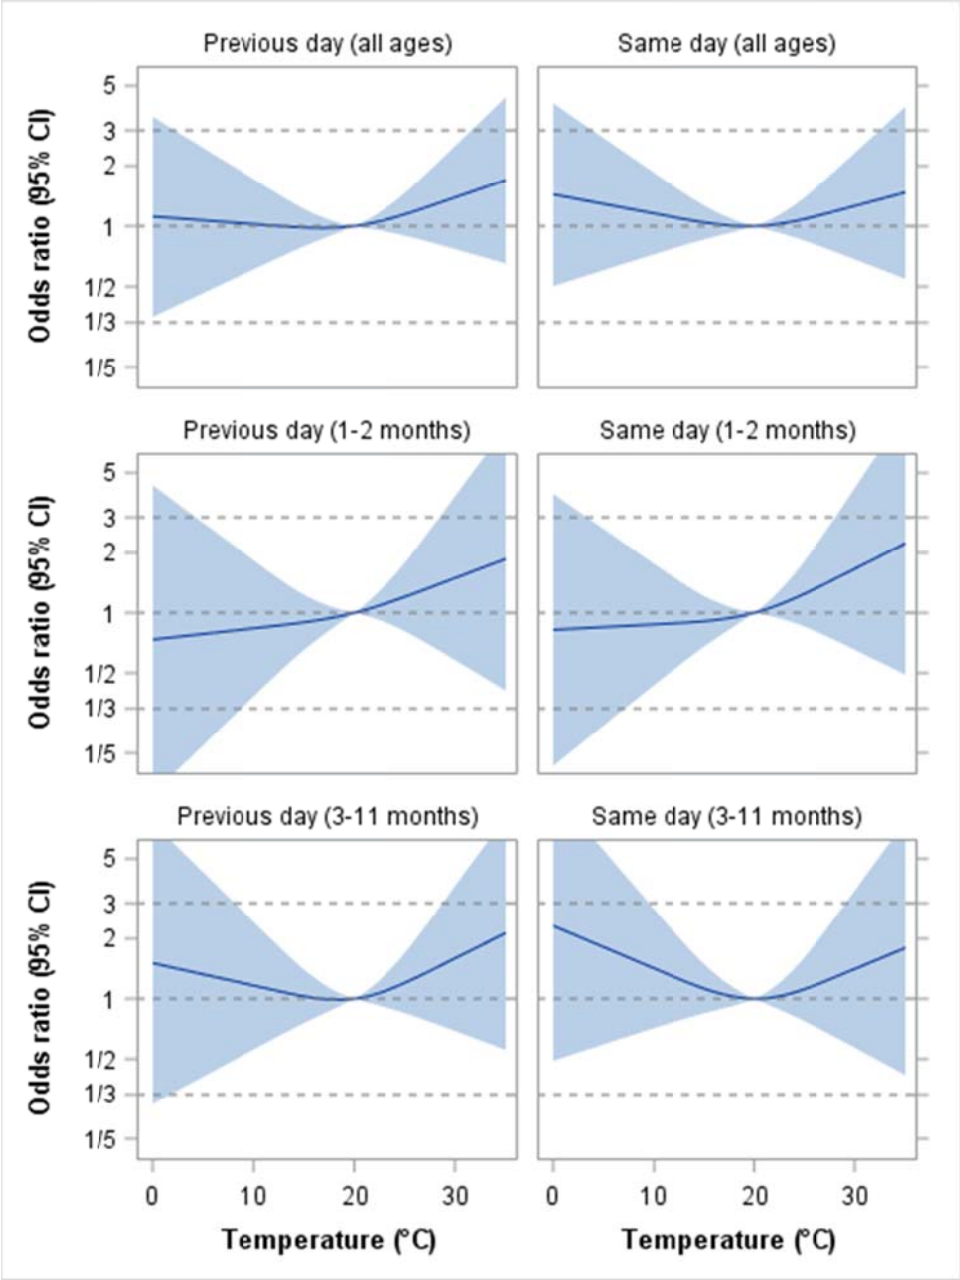

**Scenario 6:** Association between maximum outdoor temperature and SIDS cases with mention of autopsy, Vienna, **June–August** 1984–2014. Maximum temperature was flexibly modelled with natural cubic splines with knots placed at the 10th, 50th, and 90th percentiles. For the day before and the day of the SIDS event, odds ratios (solid blue line) and 95% CI's (transparent blue area) are shown for all ages (0-364 days) and two postneonatal periods. All odds ratios are relative to the reference temperature of 20°C, and are adjusted for mean relative humidity. The odds ratios are presented both on the original and the logarithmic scale.

P-Value for spline-modelled effect of maximum temperature:

|                           | # of SIDS cases | Previous day | Same day |
|---------------------------|-----------------|--------------|----------|
| all ages (0-364 days)     | 67              | 0.24         | 0.42     |
| 1-2 months (28-89 days)   | 24              | 0.27         | 0.33     |
| 3-11 months (90-364 days) | 36              | 0.30         | 0.45     |



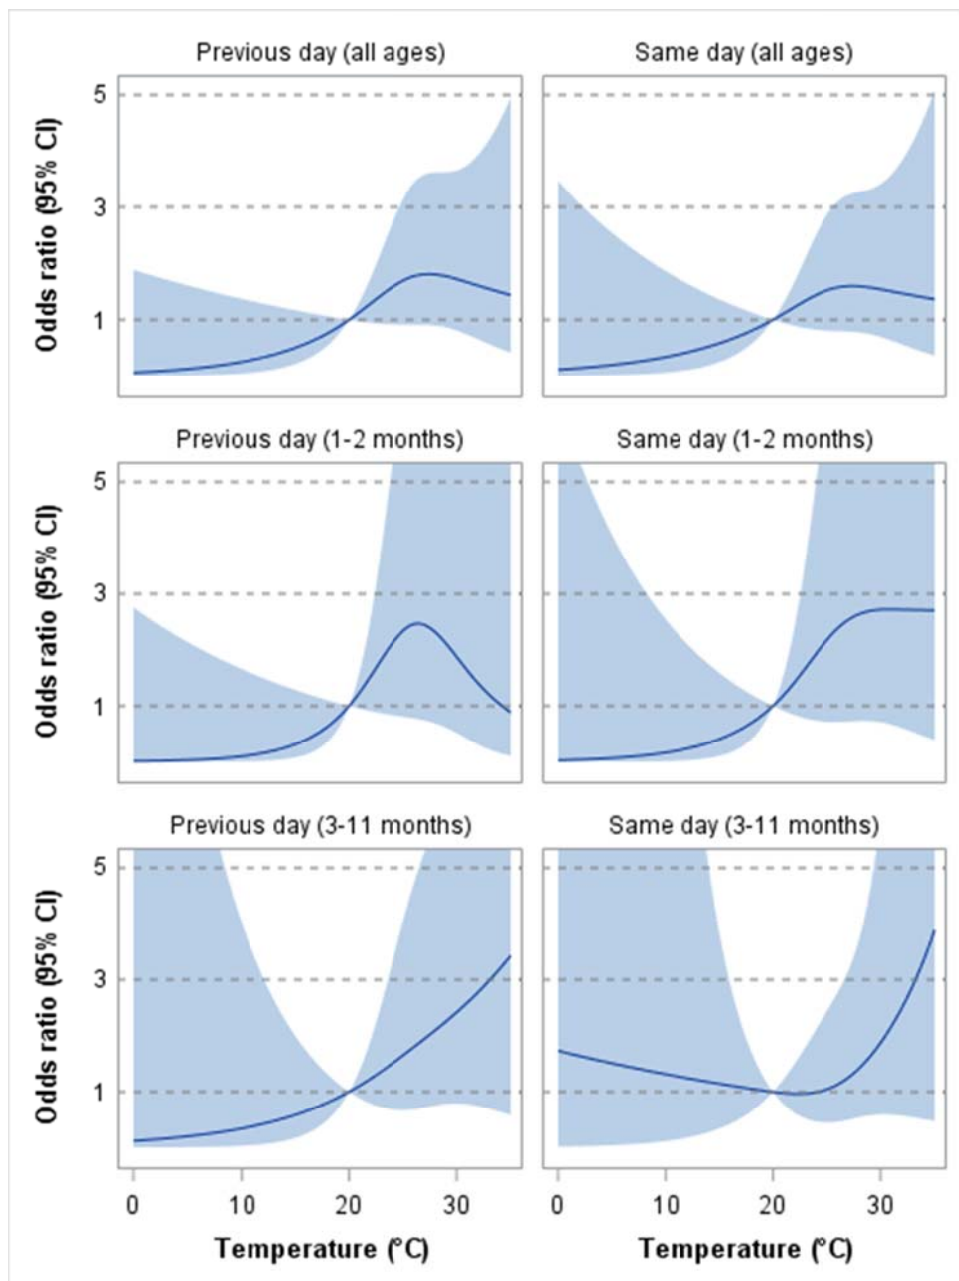

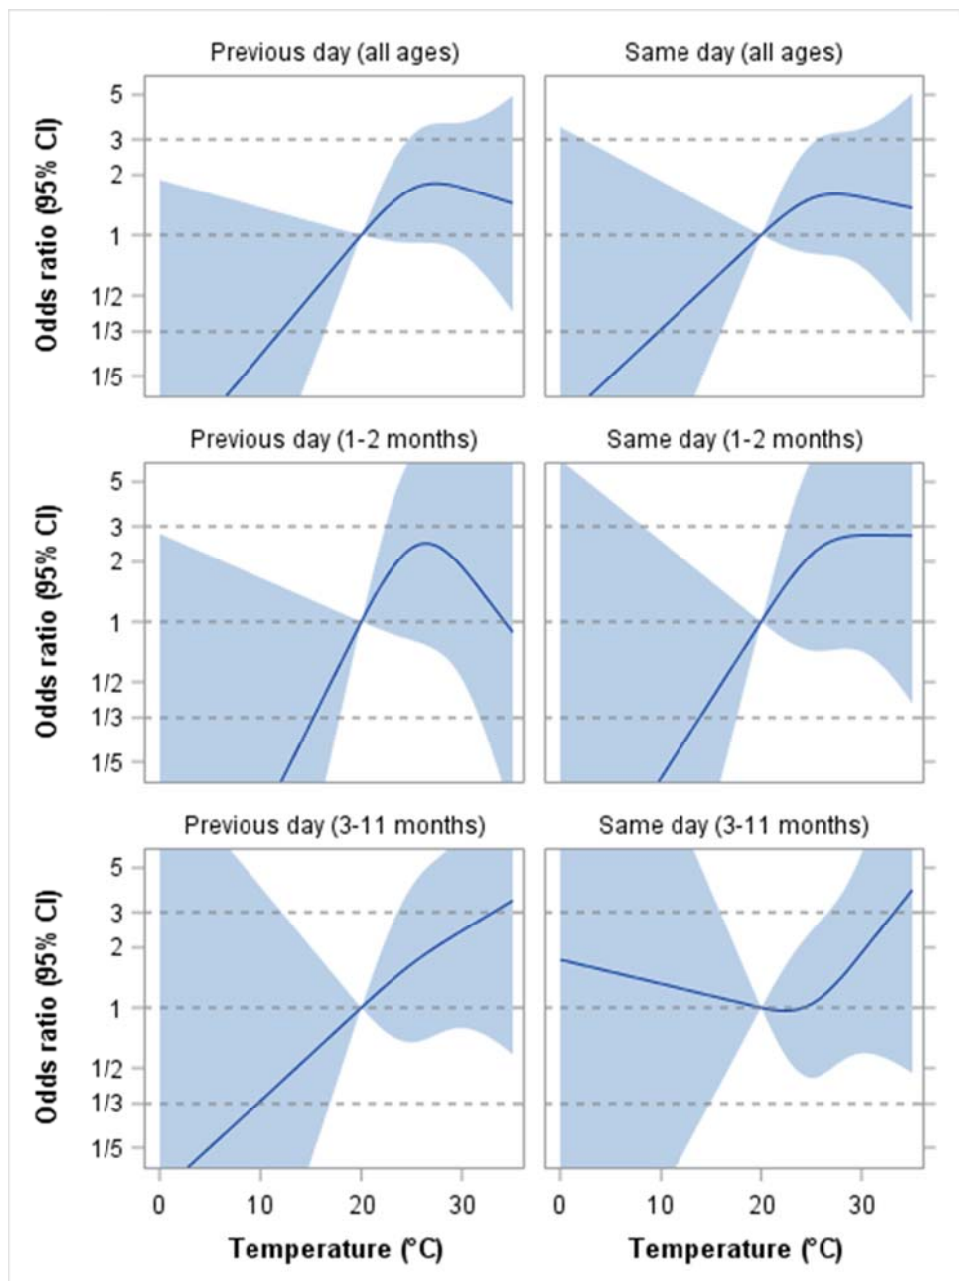

**Scenario 7:** Association between maximum outdoor temperature and SIDS cases (**both with and without mention of autopsy**), Vienna, April–October 1984–2014. Maximum temperature was flexibly modelled with natural cubic splines with knots placed at the 10th, 50th, and 90th percentiles. For the day before and the day of the SIDS event, odds ratios (solid blue line) and 95% CI's (transparent blue area) are shown for all ages (0-364 days) and two postneonatal periods. All odds ratios are relative to the reference temperature of 20°C, and are adjusted for mean relative humidity. The odds ratios are presented both on the original and the logarithmic scale.

P-Value for spline-modelled effect of maximum temperature:

|                           | # of SIDS cases | Previous day | Same day |
|---------------------------|-----------------|--------------|----------|
| all ages (0-364 days)     | 201             | 0.71         | 0.89     |
| 1-2 months (28-89 days)   | 77              | 0.52         | 0.44     |
| 3-11 months (90-364 days) | 103             | 0.69         | 0.49     |

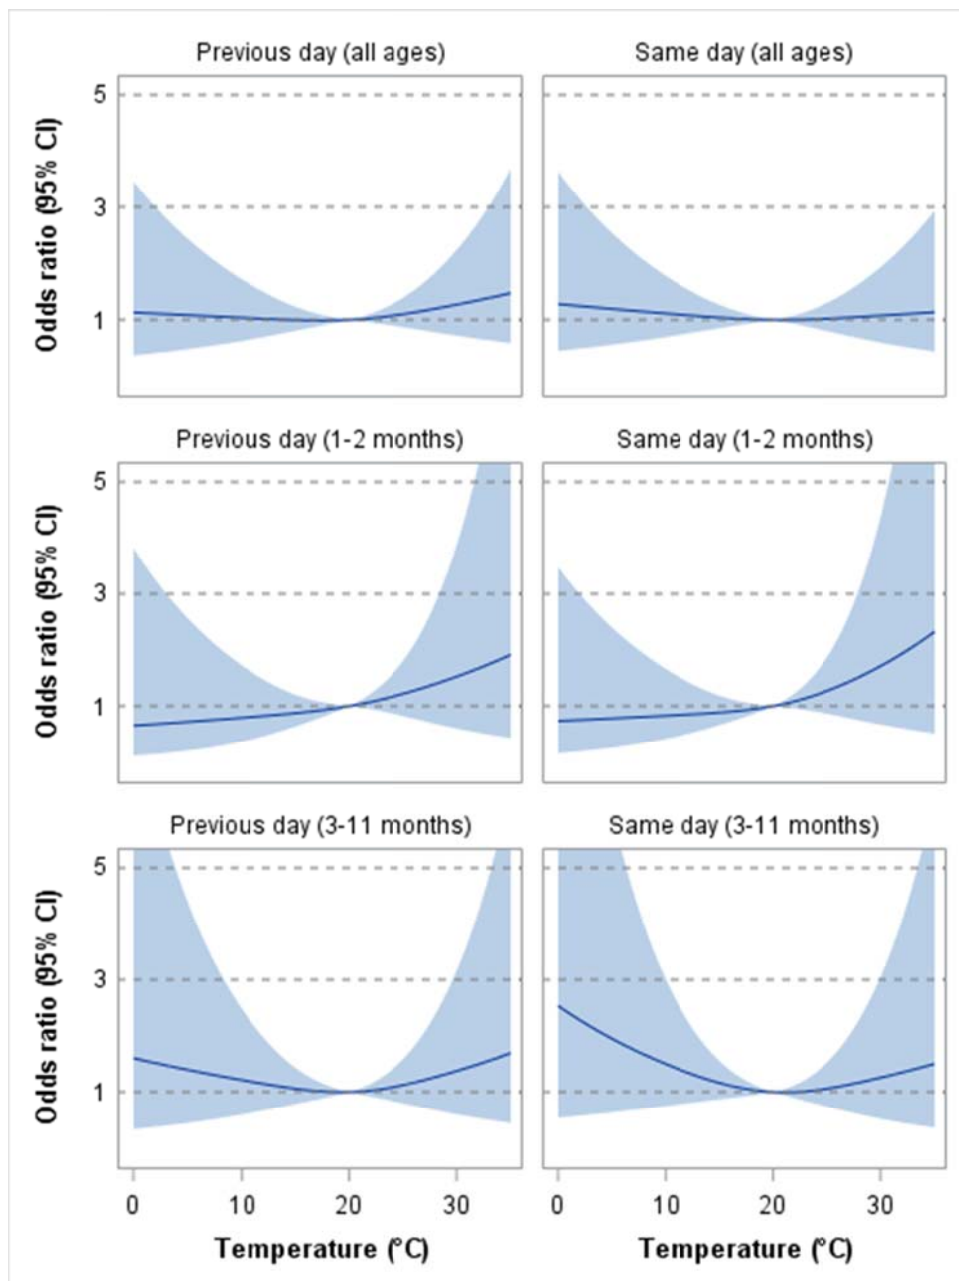

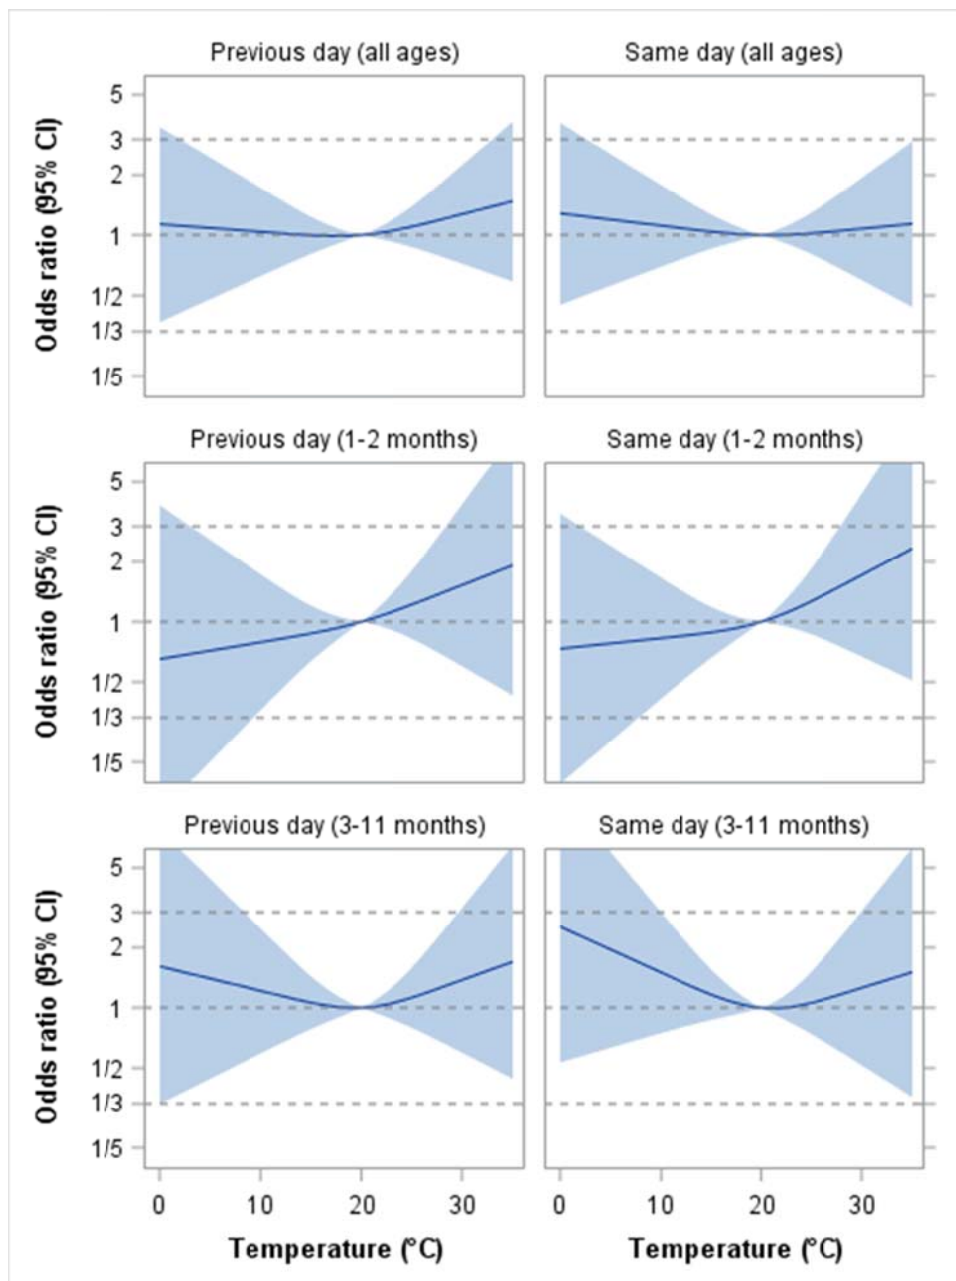

**Scenario 8:** Association between maximum outdoor temperature and SIDS cases with mention of autopsy, **Vienna plus other Austrian cities (Klagenfurt, Linz, Wels, Salzburg, Graz, Innsbruck, Bregenz, Dornbirn)**, April–October 1984–2014. Maximum temperature was flexibly modelled with natural cubic splines with knots placed at the 10th, 50th, and 90th percentiles. For the day before and the day of the SIDS event, odds ratios (solid blue line) and 95% CI's (transparent blue area) are shown for all ages (0-364 days) and two postneonatal periods. All odds ratios are relative to the reference temperature of 20°C, and are adjusted for mean relative humidity. The odds ratios are presented both on the original and the logarithmic scale.

P-Value for spline-modelled effect of maximum temperature:

|                           | # of SIDS cases | Previous day | Same day |
|---------------------------|-----------------|--------------|----------|
| all ages (0-364 days)     | 276             | 0.54         | 0.63     |
| 1-2 months (28-89 days)   | 110             | 0.84         | 0.23     |
| 3-11 months (90-364 days) | 144             | 0.36         | 0.39     |

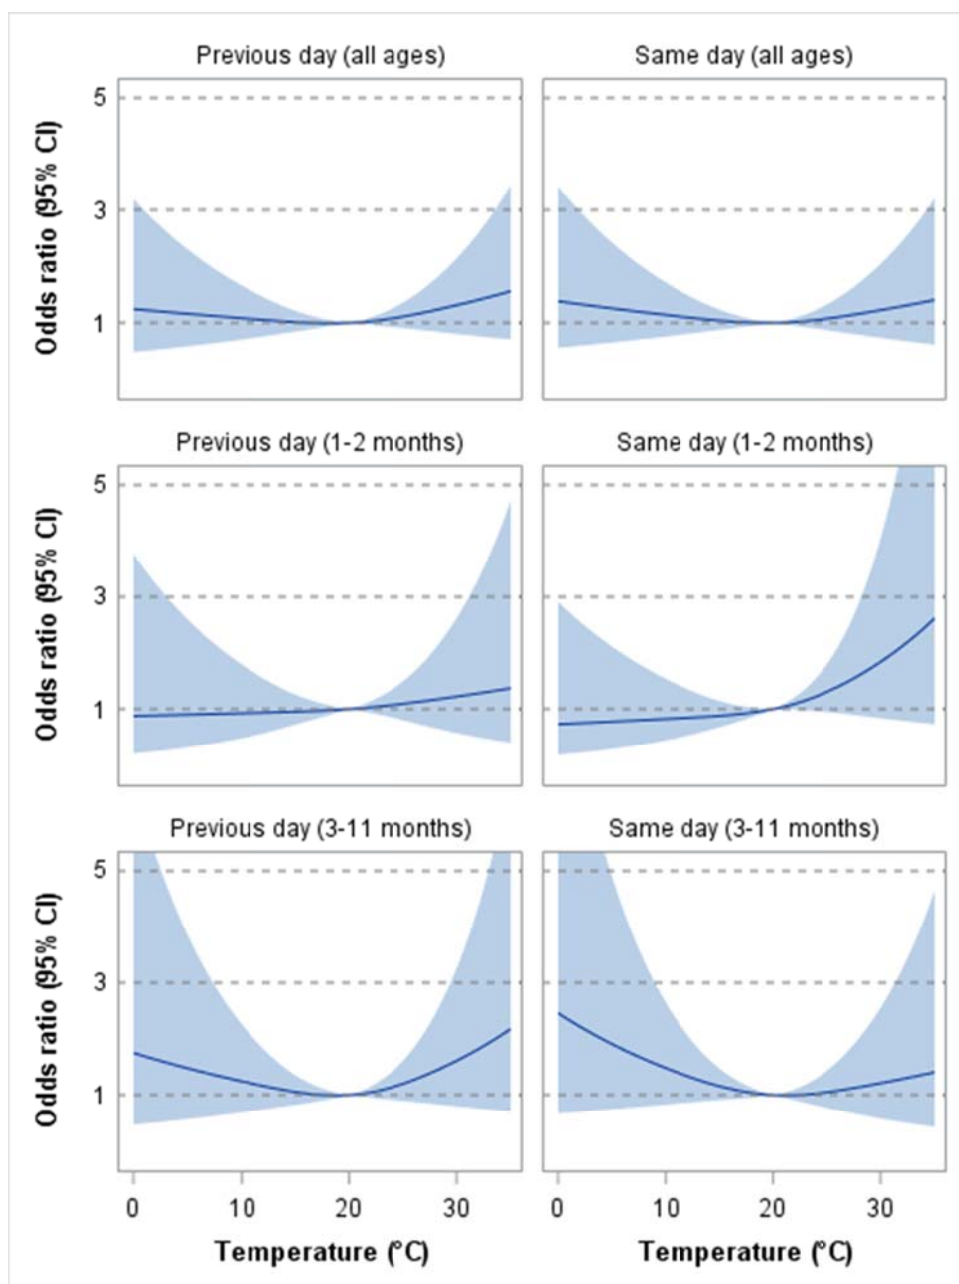

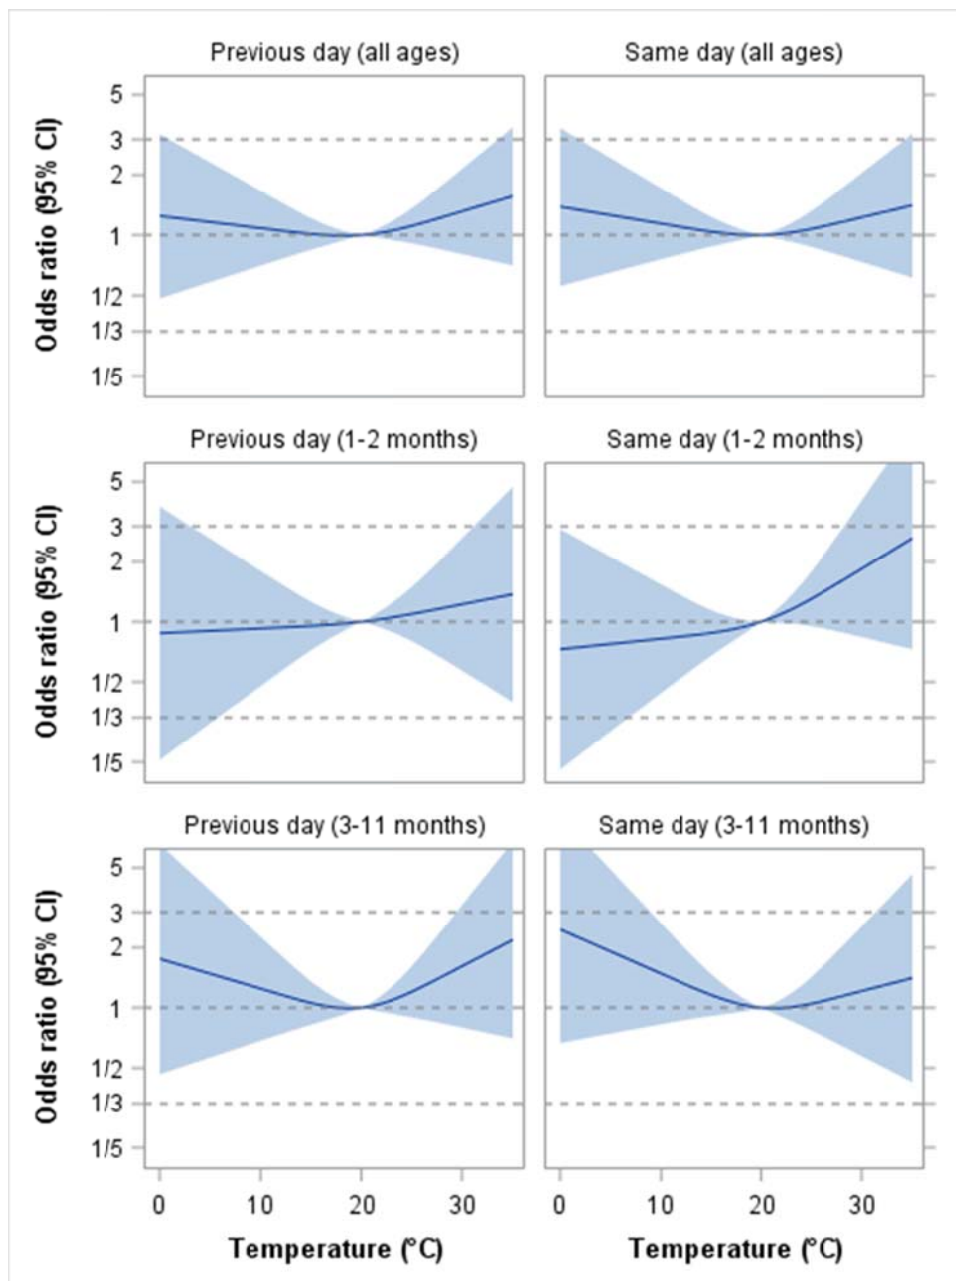



**Scenario 9:** Association between maximum outdoor temperature and SIDS cases with mention of autopsy, Vienna, April–October 1984–2014. Maximum temperature was flexibly modelled with natural cubic splines with knots placed at the 10th, 50th, and 90th percentiles. For the day before and the day of the SIDS event, odds ratios (solid blue line) and 95% CI's (transparent blue area) are shown **for 3-6 months (90-212 days)**. All odds ratios are relative to the reference temperature of 20°C, and are adjusted for mean relative humidity. The odds ratios are presented both on the original and the logarithmic scale.

P-Value for spline-modelled effect of maximum temperature:

|                          | # of SIDS cases | Previous day | Same day |
|--------------------------|-----------------|--------------|----------|
| 3-6 months (90-212 days) | 75              | 0.60         | 0.63     |

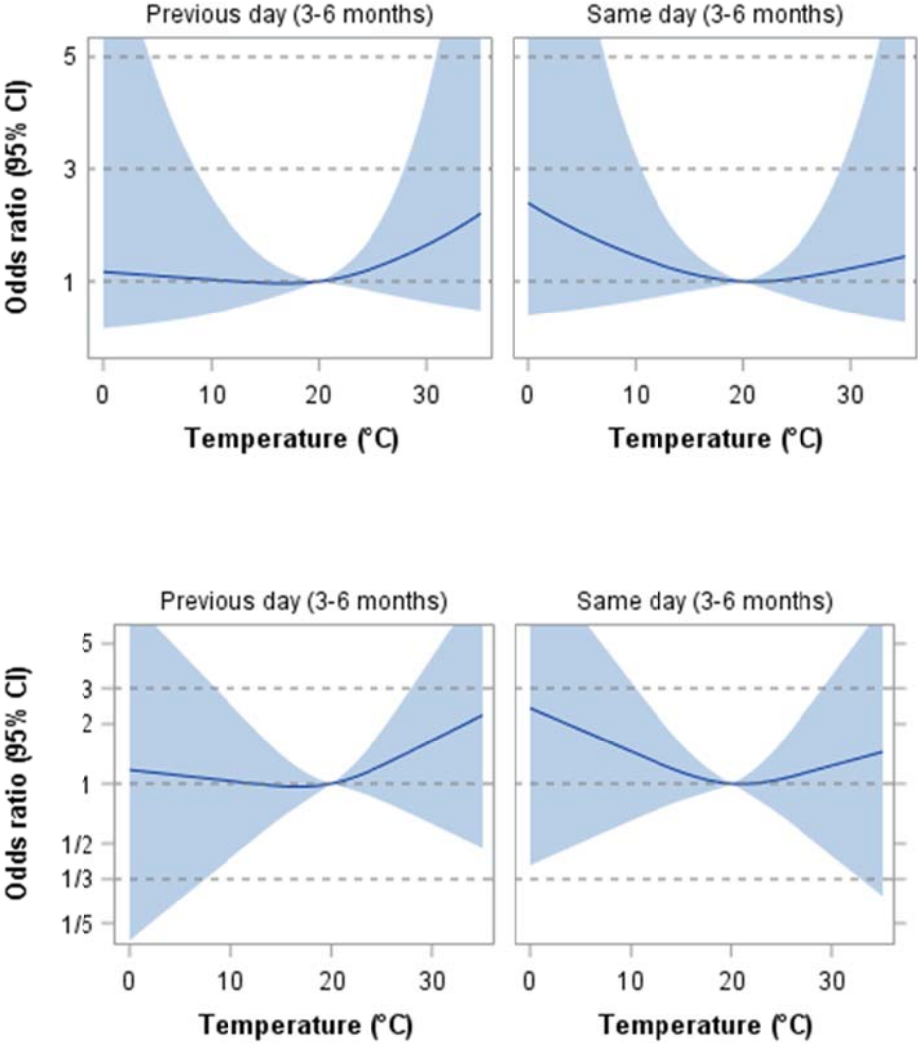

**Scenario 10:** Association between maximum outdoor temperature and SIDS cases with mention of autopsy, Vienna, April–October 1984–2014. Maximum temperature was flexibly modelled with natural cubic splines with knots placed at the 10th, 50th, and 90th percentiles. **For the second day before the SIDS event**, odds ratios (solid blue line) and 95% CI's (transparent blue area) are shown for all ages (0-364 days) and two postneonatal periods. All odds ratios are relative to the reference temperature of 20°C, and are adjusted for mean relative humidity. The odds ratios are presented both on the original and the logarithmic scale.

P-Value for spline-modelled effect of maximum temperature:

|                           | # of SIDS cases | Second day before death |
|---------------------------|-----------------|-------------------------|
| all ages (0-364 days)     | 187             | 0.25                    |
| 1-2 months (28-89 days)   | 74              | 0.20                    |
| 3-11 months (90-364 days) | 96              | 0.51                    |

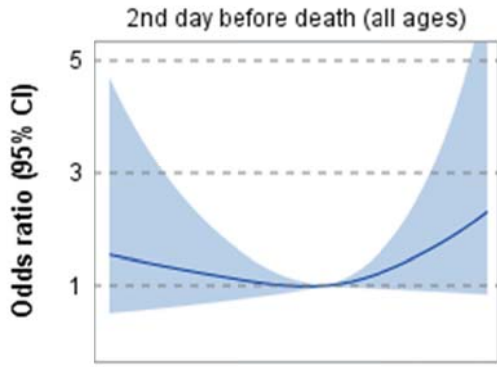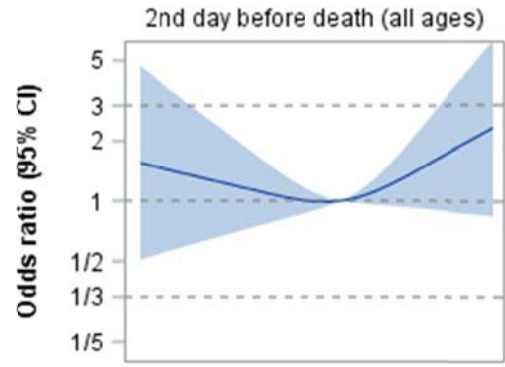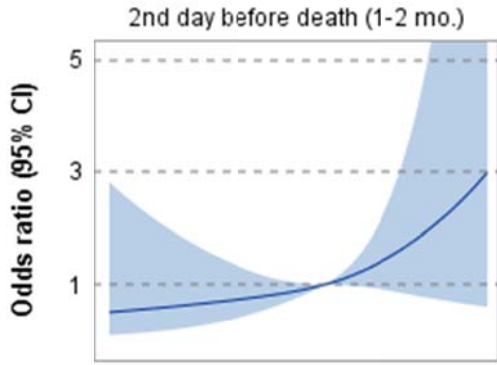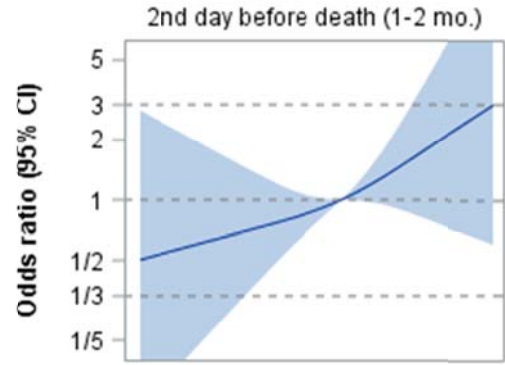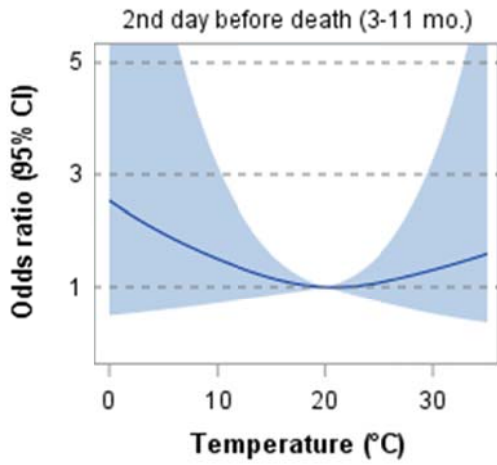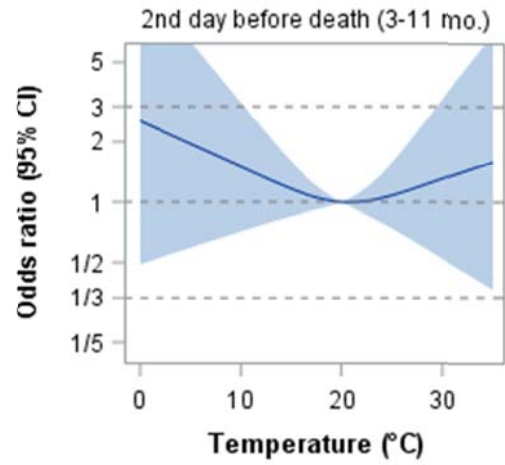

Supplement: pone.0184312.s001.pdf [file pone.0184312.s001.pdf]
